# Supplementary material for: Expanding the BonnMu sequence‐indexed repository of transposon induced maize (Zea mays L.) mutations in dent and flint germplasm
Source: PubMed Central journal article supplement — Plant J. 2024 Oct 25;120(5):2253–68. doi: 10.1111/tpj.17088 (PMC11629751; doi:10.1111/tpj.17088), 2024-10-25
Supplement: TPJ-120-2253-s008.pdf [file TPJ-120-2253-s008.pdf]

(A)

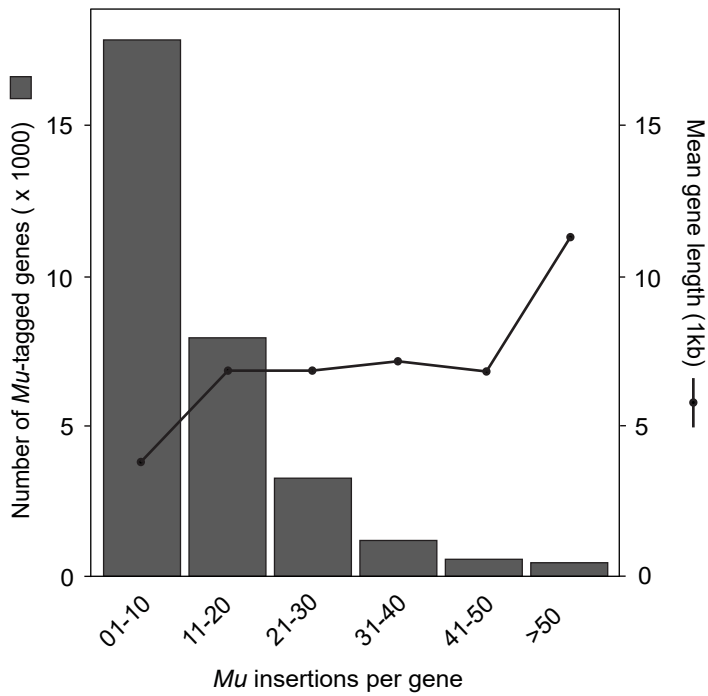

(B)

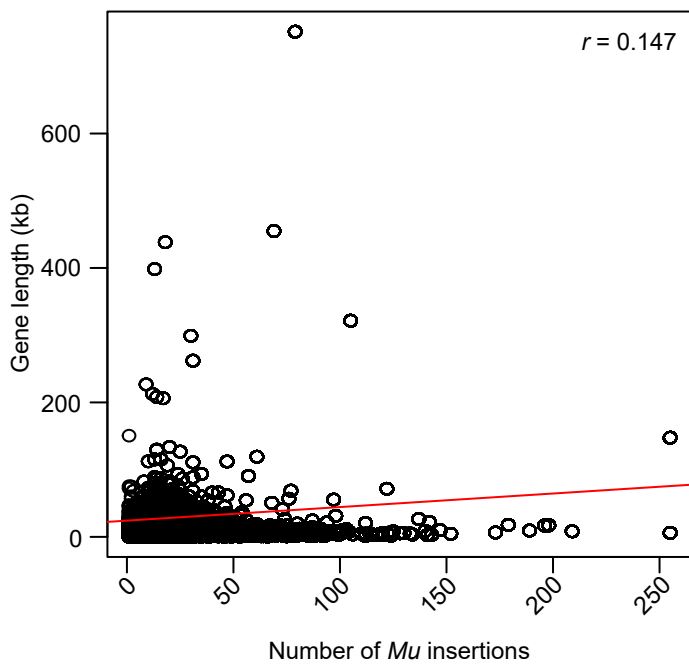

**Figure S1. Number of genes affected by *Mu* insertions and distribution of insertions.** (A) Number of tagged genes and associated mean gene length plotted against the number of *Mu* insertions. Only insertions in 5' and 3' UTRs, exons and introns of genes were considered. (B) Distribution of affected gene lengths plotted against the number of individual *Mu* insertions. The calculated Pearson correlation coefficient is  $r = 0.147$ . The number of insertions >50 ranges from 51 to 255 *Mu* insertions per gene.
