# Supplementary material for: Expanding the BonnMu sequence‐indexed repository of transposon induced maize (Zea mays L.) mutations in dent and flint germplasm
Source: PubMed Central journal article supplement — Plant J. 2024 Oct 25;120(5):2253–68. doi: 10.1111/tpj.17088 (PMC11629751; doi:10.1111/tpj.17088), 2024-10-25
Supplement: TPJ-120-2253-s011.pdf [file TPJ-120-2253-s011.pdf]

(A)

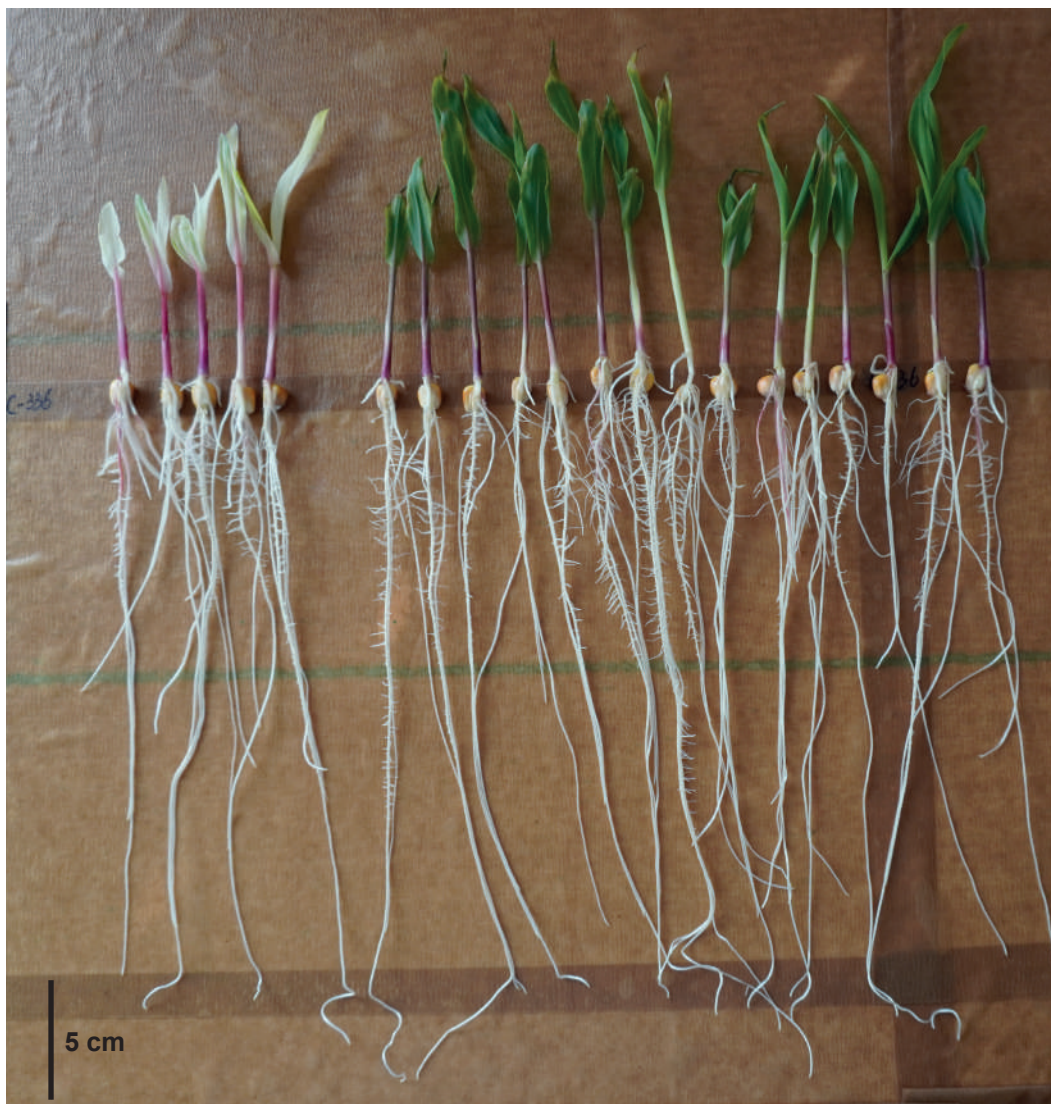

(B)

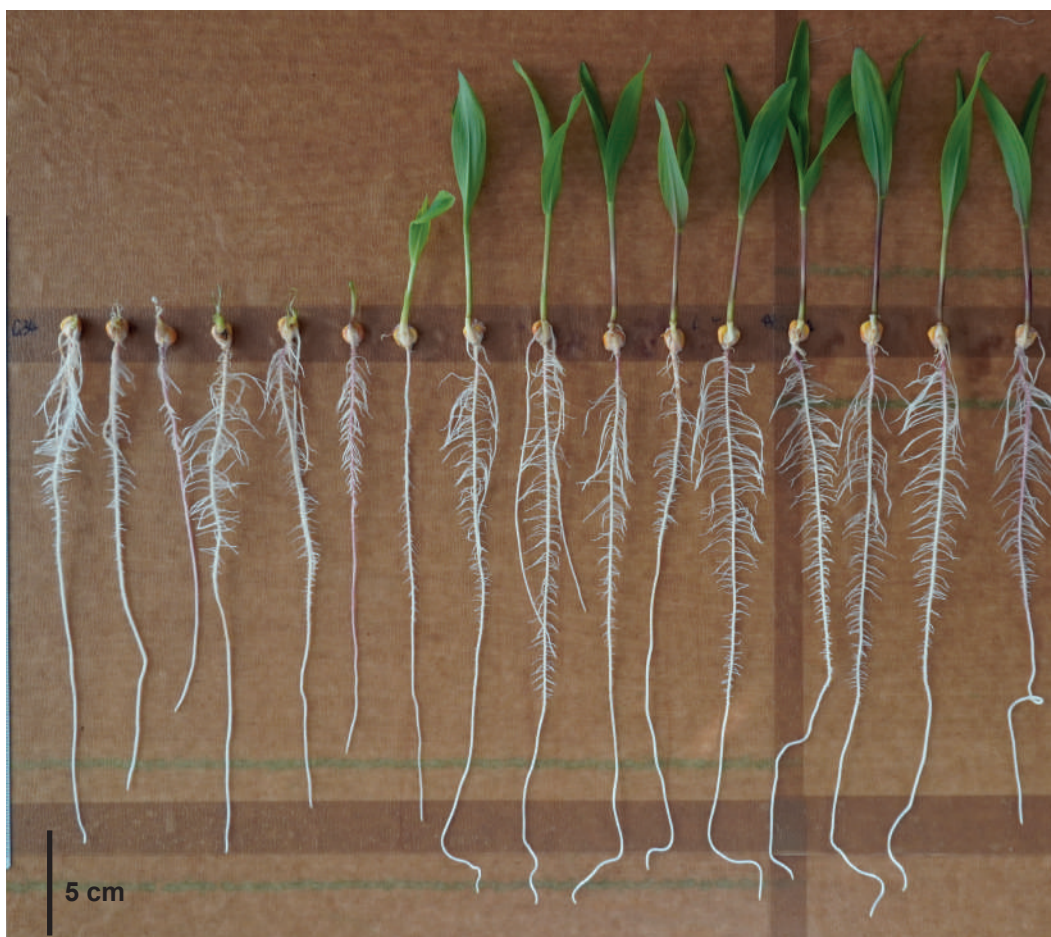

**Figure S2. Exemplary seedling mutants segregating from two *BonnMu* F<sub>2</sub>-families: (A) pale green leaf mutants from *BonnMu*-7-C-0336 and (B) mutants affected in shoot development from *BonnMu*-9-G-0034.**
